# Supplementary material
Source: PubMed Central journal article supplement (PMC7020138)
Supplement: nl9b04607_si_001.pdf [file nl9b04607_si_001.pdf]

# Supporting Information

## Integrin Subtypes and Nanoscale Ligand Presentation Influence Drug Sensitivity in Cancer Cells

*Jennifer L. Young<sup>†,‡</sup>, Ximeng Hua<sup>†,‡</sup>, Heidi Somsel<sup>†,‡</sup>, Florian Reichart<sup>§</sup>, Horst Kessler<sup>§</sup>, and  
Joachim P. Spatz<sup>†,‡,\*</sup>*

<sup>†</sup>Department of Cellular Biophysics, Max Planck Institute for Medical Research, 69120  
Heidelberg, Germany

<sup>‡</sup>Department of Biophysical Chemistry, Heidelberg University, 69120 Heidelberg, Germany

<sup>§</sup>Department of Chemistry, Technical University of Munich, 85748 Garching, Germany

\*spatz@mr.mpg.de; +49 6221 486-420

Contents

|                                            | Page #  |
|--------------------------------------------|---------|
| 1. Materials and Methods.....              | S3-S5   |
| 2. Supporting Experiments.....             | S5      |
| 3. Supplemental Figures.....               | S6-S12  |
| 4. Tables of Significance Comparisons..... | S13-S15 |
| 5. Supporting References.....              | S15     |

## Materials and Methods

*Protein functionalized surfaces.* White-walled tissue culture treated plastic 96-well plates (Greiner Bio-One) were coated with 10 µg/mL human plasma fibronectin (Roche) or human plasma vitronectin (Promega) in sterile 1X PBS overnight at 4°C with gentle shaking to ensure a uniform layer was deposited. After incubation, plates were rinsed two times with sterile 1X PBS. 1% BSA (Serva) dissolved in sterile 1X PBS was added for 15 min at 37°C in order to prevent non-specific cell binding to any potentially remaining exposed surface. Plates were rinsed again three times with sterile 1X PBS then sterilized under UV for 30 min before cell plating.

*Preparation of AuNP arrays.* Block copolymer micelle nanolithography (BCMN) was utilized to produce hexagonally ordered gold nanoparticle (AuNP) arrays as described previously<sup>1</sup>. Briefly, CARO solution (3:1 sulphuric acid:hydrogen peroxide) was used to clean borosilicate glass slides of 25 x 85 x 1 mm (cut in-house, for survival and motility assays) or 12 mm Ø #1 borosilicate glass coverslips (Roth, for immunofluorescence experiments) for 2 hr, followed by extensive rinsing and sonication in MiliQ H<sub>2</sub>O. Gold micellar solutions were produced by dissolving polystyrene-*b*-poly(2-vinylpyridine) (P2VP) diblock copolymer (Polymer Source) in *o*-xylene and subsequently loading micelles with HAuCl<sub>4</sub>·3H<sub>2</sub>O (Sigma Aldrich) at  $L = 0.3 - 0.5$  according to  $L = n [\text{HAuCl}_4] / n [\text{P2VP}]$ . The glass substrates were then spin-coated with 12 µL (for 12 mm Ø coverslips) or 120 µL (for 25 x 85 mm slides) of the gold micellar solution using a WS-650HZ-23NPP/A2/AR2 spin coater (Laurell Technologies Cooperation, USA). The samples were then treated with argon/hydrogen plasma (90% Ar/10% H<sub>2</sub>) in a Tepla PS210 microwave plasma system (PVA Tepla, Germany) for 45 min at 350 W and 0.4 mbar in order to remove the copolymer. The theoretical repeat units of PS (288 or 501), the concentration of copolymer (3 - 5 mg/mL), and the spin speed (3,000 – 8,000 rpm) were all optimized to produce surfaces with uniform AuNP spacing of 35, 50 and 70 nm. Theoretical repeat units of P2VP were kept constant at 119.

*Peptide functionalization of AuNP array-coated substrates.* In order to avoid potential protein adsorption and cell attachment onto the glass surface between the AuNPs, surfaces were activated with O<sub>2</sub> plasma for 10 min at 150 W and 0.4 mbar and directly passivated by adding 0.25 mg/mL PLL(20)-g[3.5]-PEG(2) (SuSoS Surface Technology, Switzerland) dissolved in HEPES buffer (10 mM, pH 7.4) for 45 min, then rinsed in MiliQ H<sub>2</sub>O and dried under N<sub>2</sub> flow. Under sterile conditions, 16-well ProPlate<sup>®</sup> molds (Grace Bio-labs, USA) were mounted onto the AuNP glass slides, while coverslips were placed in a petri dish, then all samples were rinsed 3X with sterile MiliQ H<sub>2</sub>O. 50 µL of 25 µM peptidomimetics dissolved in sterile MiliQ H<sub>2</sub>O were added to each well/coverslip for 2 hr at RT. The wells were then rinsed 2X with water, then 2X with sterile 1X PBS before cell plating. Controls either without AuNPs or bare AuNPs were also included in each experiment in order to confirm successful passivation (in the former case) or peptidomimetic-specific binding of cells (in the latter case).

*Characterization of AuNP substrates.* After plasma treatment, samples were characterized via scanning electron microscopy (SEM) for spacing vs. spin speed and organization of nanoparticles. SEM samples were sputter-coated with ~ 7 nm of carbon (Low Vacuum Coater EM ACE200, Leica) and imaged in an Ultra 55FE-SEM mounted with a Gemini column (Carl Zeiss) using an in-lens detector at an accelerating voltage of 5 kV and working distance of ~ 6mm. For each sample, at least three images distributed across the surface were taken and were subsequently

quantified for both interparticle spacing and hexagonal order ( $k = 6$ ) via calculation of the  $k$ -nearest neighbors as described previously. A custom script in Fiji was utilized, with each image containing  $\sim 600 - 2,500$  particles, depending on spacing. Samples with AuNP spacing of 35, 50 and 70 nm with uniform, hexagonal arrangement determined by the 6-fold bond orientational order parameter, as previously described<sup>2</sup>, were utilized.

*Cell culture.* MDA-MB-231s (ATCC) were maintained in DMEM (Gibco) supplemented with 10 % fetal bovine serum (FBS, Sigma), 1 % non-essential amino acids (Gibco) and 1 % Penicillin-Streptomycin (Gibco) in a sterile, humidified incubator at 37°C and 5 % CO<sub>2</sub>. For initial integrin blocking and cell plating, media with only 1% FBS was used in order to avoid non-specific interactions. After trypsinization (0.05% Trypsin-EDTA, Gibco; 4 min at 37°C), cells were counted using a Z2 Coulter Particle Count and Size Analyzer (Beckman Coulter, USA), and then plated at a density of 150 cells/mm<sup>2</sup>. For blocking experiments, cells were re-suspended in 1/5 of the final plating volume required and peptidomimetics were added at 50  $\mu$ M for 10 min on ice. Warm media was then added up to the final volume such that the peptidomimetics were at 10  $\mu$ M and the cells were plated. Cells were allowed to adhere for 3 hr, at which point media was exchanged for 10 % FBS media with or without drugs. 5-Fluorouracil (5-FU; Sigma-Aldrich) was added at 100  $\mu$ M and Paclitaxel (Acros Organics) was added at 50 nM to elicit  $\sim 50$  % cell death (Fig. S5). Negative controls were prepared according to the solution in which the drugs were dissolved, i.e. PBS for 5-FU and DMSO for Paclitaxel. If peptidomimetics were used, they were also added into the media exchange at a concentration of 10  $\mu$ M.

*Immunofluorescence microscopy.* In order to examine cell morphology, focal adhesion (FA) area, and confirm integrin-specific binding, immunofluorescence was performed. Cells were fixed in 3.7 % paraformaldehyde in PBS for 20 min, rinsed 3X in PBS, and permeabilized with 1 % Triton-X 100 in PBS for 10 min. Cells were rinsed in 1 % PBS-T (1X PBS with 1 % Tween) 3X and then stained with the following primary antibodies depending on the experiment at a dilution of 1:250 in 1 % BSA in PBS-T at 4°C overnight: Anti-paxillin [Y113] rabbit monoclonal antibody (Abcam ab32084, UK); Anti-integrin  $\alpha$  V  $\beta$  3 mouse monoclonal antibody [LM609] (Abcam ab190147, UK); Anti-integrin  $\alpha$  5 rabbit monoclonal antibody [EPR7854] (Abcam ab150361, UK). Following 3X rinse in PBS-T, samples were incubated with the following secondary antibodies: Chicken anti-rabbit Alexa Fluor<sup>®</sup> 488 (Life Technologies), Goat anti-mouse Alexa Fluor<sup>®</sup> 647 (Life Technologies), and Alexa Fluor<sup>®</sup> 568 phalloidin (for actin, Invitrogen) at 1:1000 at RT for 2 hr. Samples were then rinsed 3X in MiliQ H<sub>2</sub>O and mounted in Fluoromount-G<sup>®</sup> w/DAPI (Southern Biotech) and sealed with a #1 coverslip. Imaging was performed on a Zeiss Axiovert 200M (Carl Zeiss AG, Germany) using an oil-immersion 63X objective for FA visualization and a 10X objective for cell morphology visualization, captured with AxioVision Rel. 4.8 software.

*Live cell microscopy.* After plating cells on functionalized substrates, plates were moved to an Axio Observer.Z1 (Carl Zeiss AG, Germany) microscope fitted with a custom-built cell incubation chamber so that imaging could proceed in a humidified, 37°C, and 5 % CO<sub>2</sub> environment. Phase contrast images were taken at 3 - 4 points per sample every 10 minutes for 72 hr using AxioVision Rel. 4.8 software. Movies of cells migrating were analyzed in Imaris (Bitplane) software.

*Survival and proliferation assay.* Cells treated with chemotherapeutic drugs were examined for survival using the CellTiter-Glo<sup>®</sup> Luminescent Cell Viability Assay (Promega) in which the measured luminescent signal is proportional to the amount of ATP present, which is directly proportional to the number of cells in culture. After drug treatment, cell culture plates were stabilized to room temperature for 30 min, the CellTiter-Glo<sup>®</sup> Reagent was added at a 1:1 ratio to media (i.e. 100  $\mu$ L media + 100  $\mu$ L reagent), the plate was mixed to induce cell lysis for 2 min, the luminescent signal was stabilized for 10 minutes at room temperature, and luminescence was recorded with an integration time of 1 second per well. Control wells (media alone, with and without drugs, plus reagent) were also prepared to account for any experiment-specific background. The concentration of drugs used, i.e. 5-Fluorouracil at 100  $\mu$ M and Paclitaxel at 50 nM, was shown to elicit ~ 50 % cell death from a drug dose experiment (Fig. S5). Proliferation based on integrin subtype engagement on fibronectin (via performing blocking experiments) at 3 and 48 hr was also assessed (Fig. S4).

*Image and statistical analyses.* Immunofluorescent 63X images were analyzed in Fiji<sup>3</sup> for FA morphology and 10X images were analyzed in CellProfiler<sup>4</sup> for cell morphology. Cell numbers analyzed indicated in corresponding figure captions. For live cell experiments, after acquiring time lapse videos, cells were tracked and analyzed using Imaris (Bitplane) software for xy speed ( $\mu$ m/min). Roseplots representing 17 hrs of culture (in order to better visualize tracks) were created using the XTension Pack for Advanced Object Movement Analysis. All statistical analyses were performed using one-way or two-way ANOVA or student's t-test, as indicated, using Prism (GraphPad) Software. Statistical differences among groups were assessed to identify the interaction between spacing, drug treatment, and integrin subtype-specific peptidomimetics when  $p < 0.05$ . All data is presented as mean  $\pm$  95% confidence interval (CI) or standard error of the mean (sem) as indicated from triplicate biological experiments with at least 2 technical replicates per sample, unless otherwise indicated. All significance comparisons from Figures 1 C-F and 2 C-F are displayed in Tables S1 and S2, respectively.

## Supporting Experiments

*Peptidomimetic specificity.* While the integrin-specificity of our synthesized peptidomimetics has been confirmed previously<sup>5</sup>, we ensured functionality in our system by performing immunofluorescence staining of integrins  $\alpha_v\beta_3$  or  $\alpha_5\beta_1$  to observe integrin expression patterns, i.e. when engaging  $\alpha_5\beta_1$ , the presence of  $\alpha_v\beta_3$  was greatly reduced and vice versa (Fig. S2A). As an additional control, cells were plated on vitronectin (Vn), in which  $\alpha_v\beta_3$  is the major binding integrin, and treated with the  $\alpha_v\beta_3$  peptidomimetic. We observed that cell attachment was greatly hindered, with no detectable focal complex formation, thereby demonstrating the potency of the molecule at the concentration utilized (Fig. S1B-E). Proper integrin engagement was further confirmed on our peptidomimetic-functionalized surfaces (Fig. S2B).

*Cell proliferation based on integrin subtype.* In order to ensure differential cell survival mediated by engagement of specific integrin subtypes was not due to integrin subtype specific-mediated proliferation effects, we monitored cell proliferation over the time course of the experiment and observed no differences between cells on Fn engaging integrin  $\alpha_5\beta_1$ , integrin  $\alpha_v\beta_3$ , or both, compared to initial seeding (Fig. S4).

## Supplementary Figures

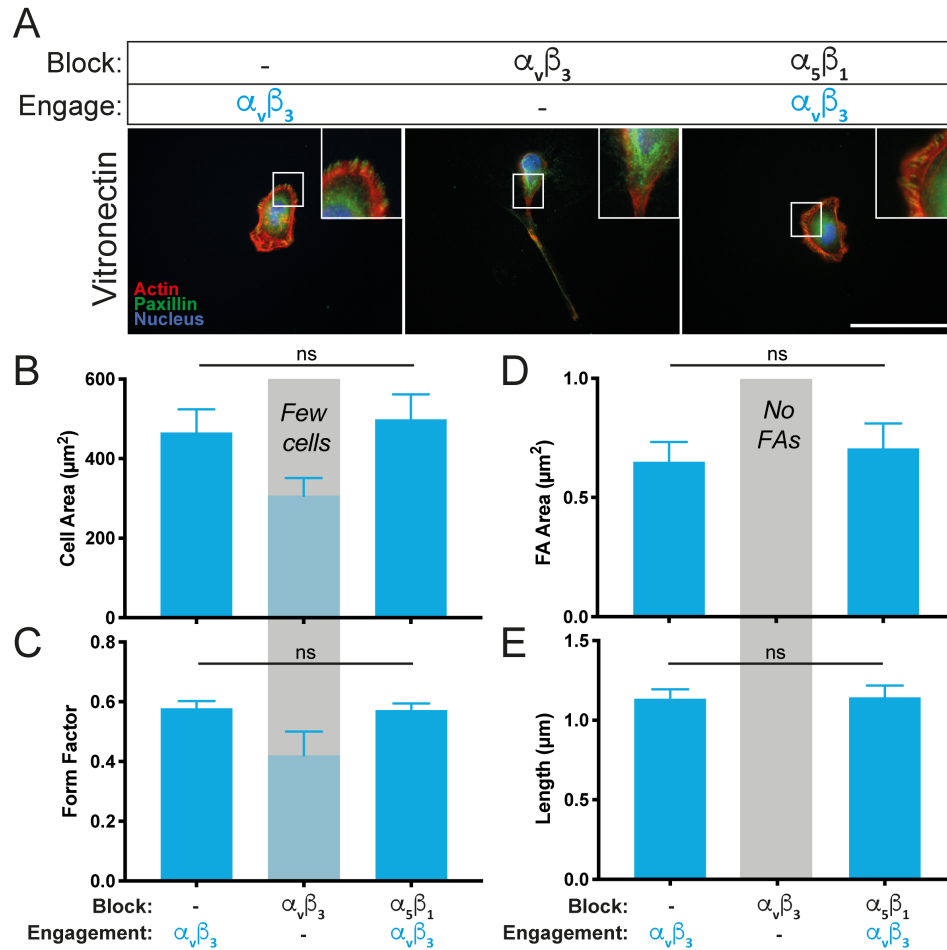

**Figure S1: Cells plated on vitronectin confirm peptidomimetic functionality.** (A) MDA-MB-231s were plated on immobilized vitronectin with the following conditions: no blocking peptidomimetics engages  $\alpha_v\beta_3$  [left], blocking of  $\alpha_v\beta_3$  results in engagement of no integrins [middle], and blocking of  $\alpha_5\beta_1$  results in engagement of  $\alpha_v\beta_3$  (no difference from no blocking case) [right]. Cells were stained for actin (red), paxillin (green), and nucleus (blue). Insets show zoomed in focal adhesions Scale bar: 50  $\mu\text{m}$ . Cell morphology in terms of cell area (B) and form factor (C) was quantified for no blocking (i.e.  $\alpha_v\beta_3$  engagement),  $\alpha_v\beta_3$  blocking (i.e. no integrin engagement), and  $\alpha_5\beta_1$  blocking (i.e.  $\alpha_v\beta_3$  engagement). Focal adhesion (FA) morphology in terms of area (D) and major axis length (E) was quantified for all conditions as in (B, C). Blocking  $\alpha_v\beta_3$  engagement resulted in very few cells attached to the surface as indicated by the gray bar; FA area could not be calculated.  $n_{\text{cells (no blocking)}} = 246$ ;  $n_{\text{cells (}\alpha_v\beta_3 \text{ blocking)}} = 20$ ;  $n_{\text{cells (}\alpha_5\beta_1 \text{ blocking)}} = 312$ .  $n_{\text{FAs}} > 620$ . Data is mean  $\pm$  95% CI. ns = not significant by two-tailed t-test.

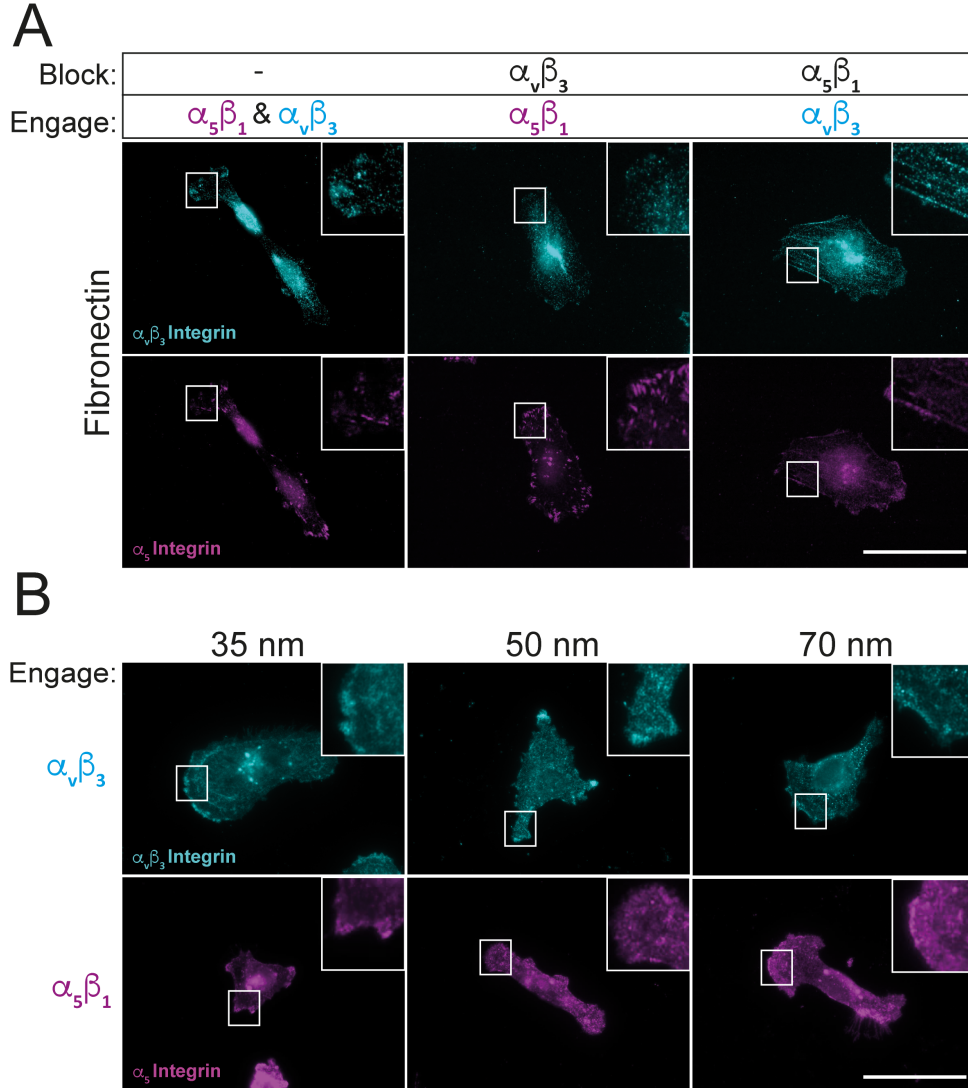

**Figure S2: Integrin staining further confirms peptidomimetic functionality.** (A) MDA-MB-231s were plated on immobilized fibronectin and treated with blocking peptidomimetics in order to control integrin subtype-specific engagement, i.e. no blocking engages both  $\alpha_5\beta_1$  and  $\alpha_v\beta_3$  (left), blocking  $\alpha_v\beta_3$  engages  $\alpha_5\beta_1$  (middle), or blocking  $\alpha_5\beta_1$  engages  $\alpha_v\beta_3$  (right). Corresponding immunofluorescence images of dual-stained cells for  $\alpha_v\beta_3$  integrin (blue, top panel) and  $\alpha_5$  integrin (purple, bottom panel) show proper integrin engagement. Insets shows zoomed in areas of the same region in each matched panel. (B) MDA-MB-231s plated on AuNPs at 35 (left), 50 (middle), or 70 (right) nm interspacing. Cells on AuNPs functionalized with  $\alpha_v\beta_3$  peptidomimetic (blue, top panel) were stained for corresponding integrin expression of  $\alpha_v\beta_3$  integrin (blue). Cells on AuNPs functionalized with  $\alpha_5\beta_1$  peptidomimetic (purple, bottom panel) were stained for corresponding integrin expression of  $\alpha_5$  integrin (purple). Insets show zoomed in areas. Scale bar: 50  $\mu$ m.

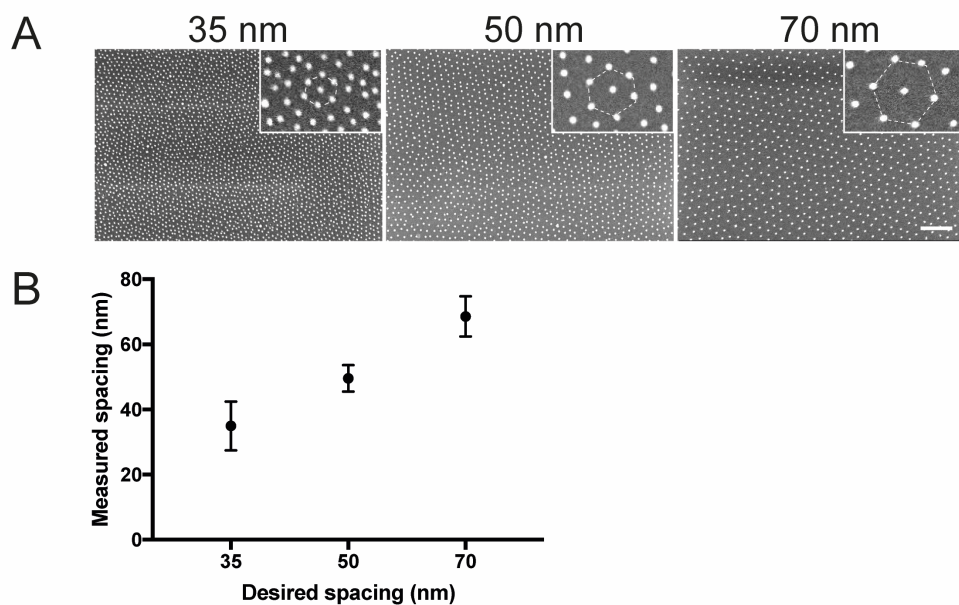

**Figure S3: Block copolymer micelle nanolithography creates highly ordered, hexagonally-arranged gold nanostructures with specific interparticle spacing.** (A) Representative SEM images of gold nanoparticles (AuNPs) interspaced at 35 nm (left), 50 nm (middle), and 70 nm (right). Inset shows a higher magnification with hexagonal order. Scale bar: 250 nm. (B) Characterization of interparticle spacing showing measured vs. desired spacing, i.e. 35 nm =  $34.94 \pm 5.31$  nm; 50 nm =  $49.55 \pm 7.96$  nm; 70 nm =  $68.59 \pm 12.08$  nm from  $n_{\text{samples}} = 5$  and  $n_{\text{AuNPs}} \sim 600 - 2,500$  per sample, depending on spacing. Data is mean  $\pm$  95% CI.

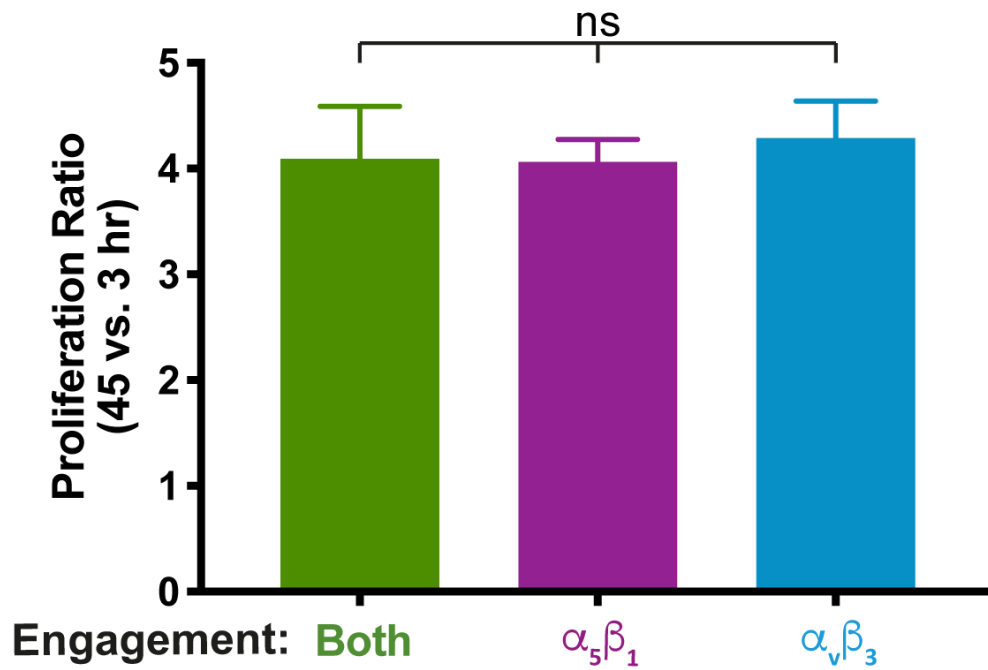

**Figure S4: Cellular proliferation does not depend on integrin subtype.** Proliferation ratio (45 hr normalized to 3 hr) of integrin subtype-specific engagement (Both, i.e.  $\alpha_5\beta_1$  and  $\alpha_v\beta_3$ : green;  $\alpha_5\beta_1$ : purple;  $\alpha_v\beta_3$ : blue). Data is mean  $\pm$  95% CI. ns = no significance by one-way ANOVA.

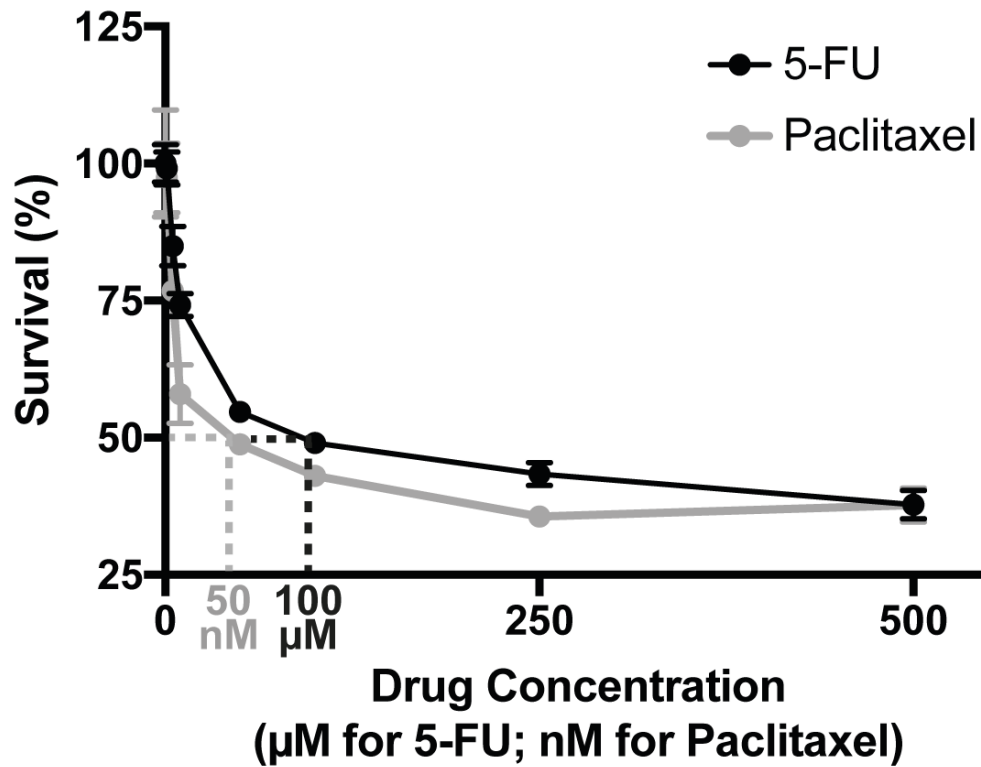

**Figure S5: Drug dose curve.** Percent survival of MDA-MB-231s plated on tissue culture plastic vs. concentration of drug, 5-FU (black) or Paclitaxel (gray), after 48 hr. Dashed lines indicate where approximately 50 % of the cells survive, i.e. 50 nM for Paclitaxel and 100 μM for 5-FU. Data is mean  $\pm$  sem.

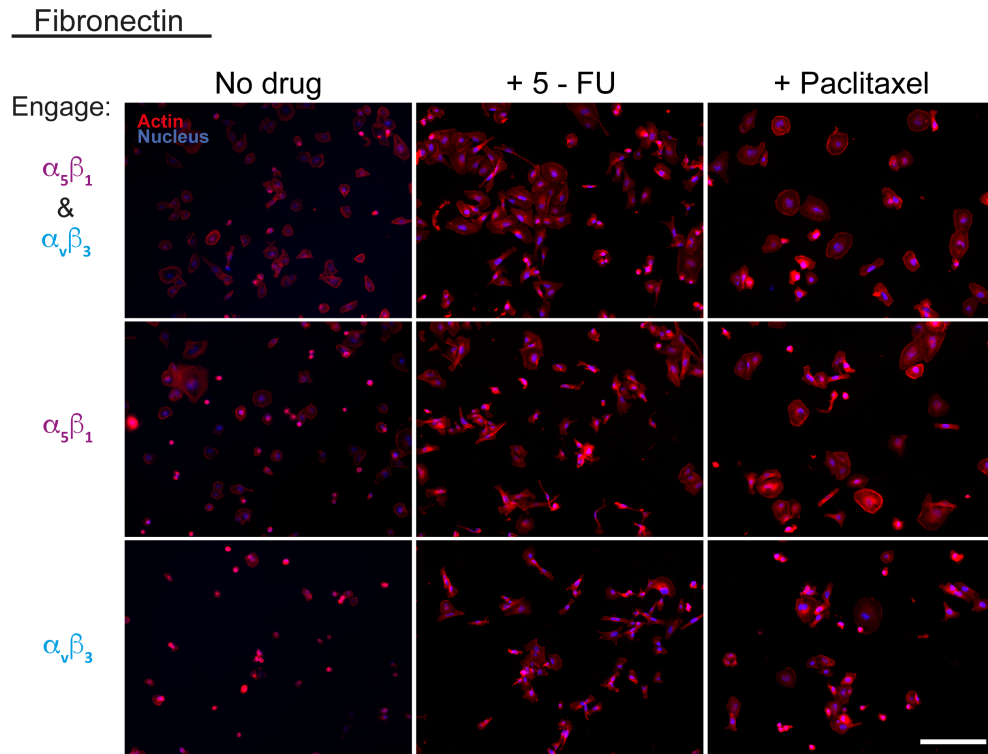

**Figure S6: Low magnification images of cells plated on fibronectin.** MDA-MB-231s were plated on immobilized fibronectin and treated with blocking peptidomimetics as follows: no blocking peptidomimetics engages both integrins [top row], blocking of  $\alpha_v\beta_3$  results in engagement of  $\alpha_5\beta_1$  (purple) [middle row], and blocking of  $\alpha_5\beta_1$  results in engagement of  $\alpha_v\beta_3$  (blue) [bottom row] with or without drug treatment (no drug: left column; + 5-FU: middle column; + paclitaxel: right column). Cells were stained for actin (red) and nucleus (blue). Scale bar: 200  $\mu\text{m}$ .

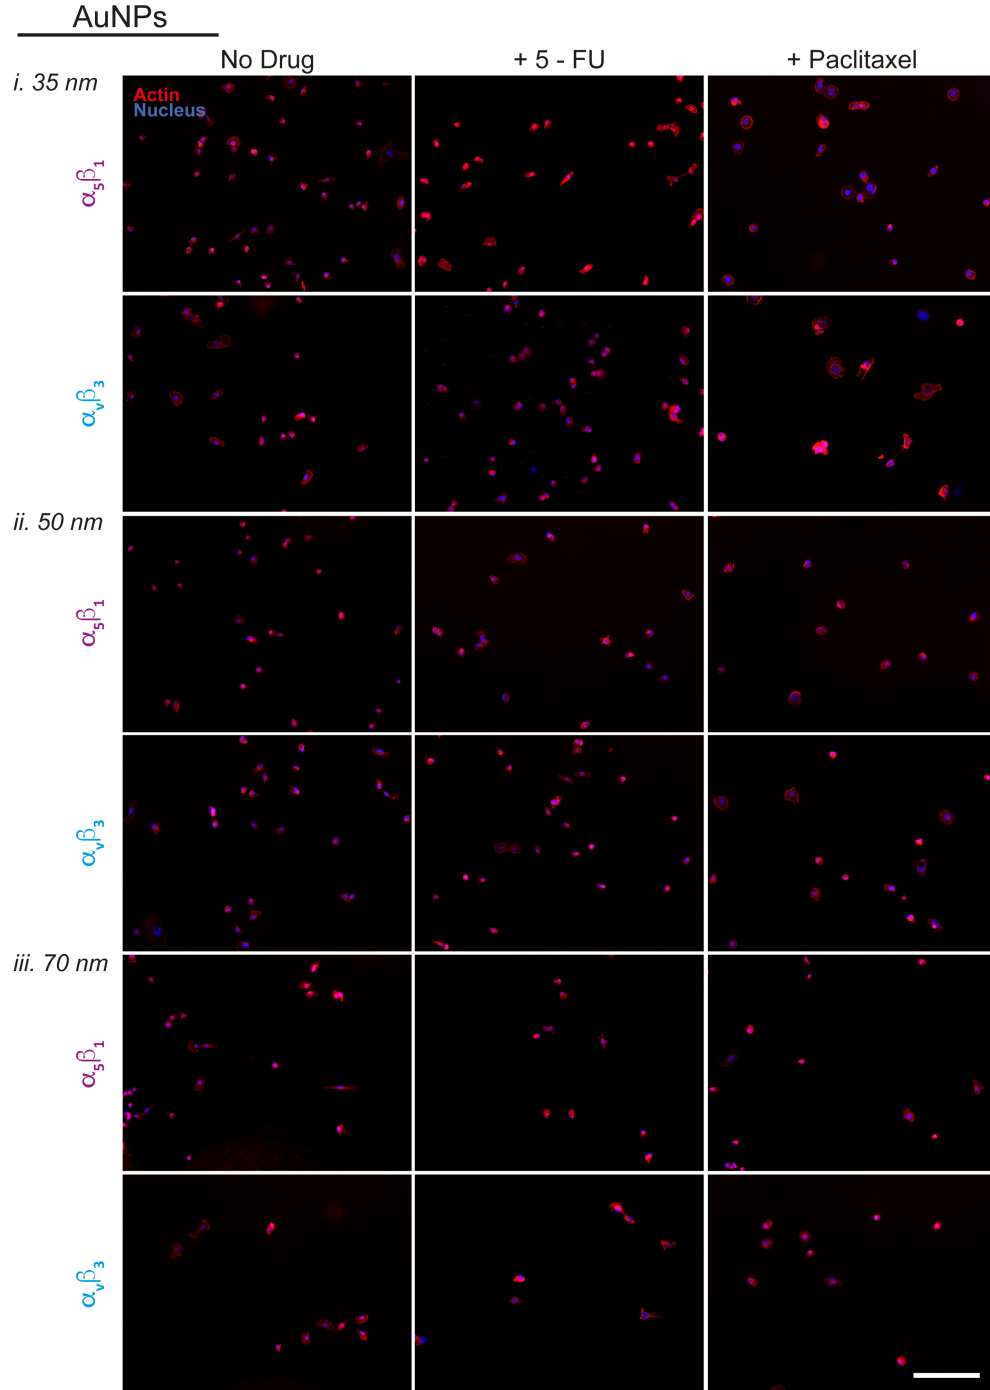

**Figure S7: Low magnification images of cells plated on gold nanoparticle arrays.** MDA-MB-231s were plated on AuNPs with interspacings of (*i.*) 35 nm, (*ii.*) 50 nm, or (*iii.*) 70 nm functionalized with integrin-specific peptidomimetics, i.e.  $\alpha_5\beta_1$  (purple) or  $\alpha_v\beta_3$  (blue), with or without drug treatment (no drug: left column; + 5-FU: middle column; + paclitaxel: right column). Cells were stained for actin (red) and nucleus (blue). Scale bar: 200  $\mu$ m.

## Tables of Significance

All significance comparisons by one-way ANOVA are displayed for experiments in Figure 1C-F (Table S1) and Figure 2C-F (Table S2).

Table S1: Table of significance of cells plated on fibronectin from all conditions (from Fig. 1C-F)

| Tukey's multiple comparisons test                                 | Cell Area |         | Cell Form Factor |         | FA Area |         | FA Length |         |
|-------------------------------------------------------------------|-----------|---------|------------------|---------|---------|---------|-----------|---------|
|                                                                   | Summary   | P Value | Summary          | P Value | Summary | P Value | Summary   | P Value |
| Both vs. Both + 5-FU                                              | ns        | >0.9999 | ****             | <0.0001 | ****    | <0.0001 | ***       | 0.0009  |
| Both vs. Both + Paclitaxel                                        | ***       | 0.0009  | ns               | 0.6135  | ns      | 0.2683  | ns        | 0.071   |
| Both vs. $\alpha 5\beta 1$                                        | ns        | 0.9995  | ****             | <0.0001 | ns      | 0.9658  | ns        | >0.9999 |
| Both vs. $\alpha v\beta 3$                                        | ****      | <0.0001 | ****             | <0.0001 | ****    | <0.0001 | ****      | <0.0001 |
| Both + 5-FU vs. Both + Paclitaxel                                 | ****      | <0.0001 | ****             | <0.0001 | ns      | 0.4952  | ns        | 0.9894  |
| Both + 5-FU vs. $\alpha 5\beta 1$ + 5-FU                          | ns        | 0.2096  | ****             | <0.0001 | ns      | 0.3011  | ns        | 0.5976  |
| Both + 5-FU vs. $\alpha v\beta 3$ + 5-FU                          | ***       | 0.0001  | *                | 0.0419  | *       | 0.034   | ns        | >0.9999 |
| Both + Paclitaxel vs. $\alpha 5\beta 1$ + Paclitaxel              | ns        | >0.9999 | ns               | 0.5247  | *       | 0.0184  | ns        | 0.9966  |
| Both + Paclitaxel vs. $\alpha v\beta 3$ + Paclitaxel              | ****      | <0.0001 | ns               | 0.3276  | ns      | 0.8215  | *         | 0.0194  |
| $\alpha 5\beta 1$ vs. $\alpha 5\beta 1$ + 5-FU                    | ns        | 0.9924  | ****             | <0.0001 | ****    | <0.0001 | ****      | <0.0001 |
| $\alpha 5\beta 1$ vs. $\alpha 5\beta 1$ + Paclitaxel              | ***       | 0.0003  | ***              | 0.0002  | ****    | <0.0001 | **        | 0.0057  |
| $\alpha 5\beta 1$ vs. $\alpha v\beta 3$                           | ****      | <0.0001 | ns               | 0.2784  | ****    | <0.0001 | ****      | <0.0001 |
| $\alpha 5\beta 1$ + 5-FU vs. $\alpha 5\beta 1$ + Paclitaxel       | ****      | <0.0001 | ****             | <0.0001 | ns      | 0.9363  | ns        | 0.3387  |
| $\alpha 5\beta 1$ + 5-FU vs. $\alpha v\beta 3$ + 5-FU             | ns        | 0.2705  | ns               | 0.9857  | ns      | 0.9789  | ns        | 0.3876  |
| $\alpha 5\beta 1$ + Paclitaxel vs. $\alpha v\beta 3$ + Paclitaxel | ****      | <0.0001 | ns               | >0.9999 | ****    | <0.0001 | ***       | 0.0001  |
| $\alpha v\beta 3$ vs. $\alpha v\beta 3$ + 5-FU                    | *         | 0.034   | ****             | <0.0001 | ns      | 0.9722  | ****      | <0.0001 |
| $\alpha v\beta 3$ vs. $\alpha v\beta 3$ + Paclitaxel              | ****      | <0.0001 | ****             | <0.0001 | ****    | <0.0001 | ****      | <0.0001 |
| $\alpha v\beta 3$ + 5-FU vs. $\alpha v\beta 3$ + Paclitaxel       | ns        | 0.1203  | ****             | <0.0001 | ****    | <0.0001 | **        | 0.005   |

Table S2: Table of significance for cells plated on AuNPs from all conditions (from Fig. 2C-F)

| Tukey's multiple comparisons test                                                | Cell Area |         | Cell Form Factor |         | FA Area |         | FA Length |         |
|----------------------------------------------------------------------------------|-----------|---------|------------------|---------|---------|---------|-----------|---------|
|                                                                                  | Summary   | P Value | Summary          | P Value | Summary | P Value | Summary   | P Value |
| 35 nm $\alpha 5\beta 1$ vs.<br>35 nm $\alpha 5\beta 1$ + 5-FU                    | ns        | 0.9786  | ****             | <0.0001 | ns      | 0.9997  | ns        | 0.9839  |
| 35 nm $\alpha 5\beta 1$ vs.<br>35 nm $\alpha 5\beta 1$ + Paclitaxel              | ns        | 0.7849  | *                | 0.0221  | ns      | >0.9999 | ns        | >0.9999 |
| 35 nm $\alpha 5\beta 1$ vs.<br>50 nm $\alpha 5\beta 1$                           | **        | 0.005   | ***              | 0.0001  | ns      | 0.5058  | ns        | >0.9999 |
| 35 nm $\alpha 5\beta 1$ vs.<br>70 nm $\alpha 5\beta 1$                           | *         | 0.0129  | ****             | <0.0001 | *       | 0.027   | ns        | 0.8435  |
| 35 nm $\alpha 5\beta 1$ vs.<br>35 nm $\alpha v\beta 3$                           | ns        | >0.9999 | ***              | 0.0004  | ns      | 0.6411  | ns        | 0.944   |
| 35 nm $\alpha 5\beta 1$ + 5-FU vs.<br>35 nm $\alpha 5\beta 1$ + Paclitaxel       | ns        | 0.1932  | ****             | <0.0001 | ns      | >0.9999 | ns        | 0.9999  |
| 35 nm $\alpha 5\beta 1$ + 5-FU vs.<br>50 nm $\alpha 5\beta 1$ + 5-FU             | ns        | >0.9999 | ns               | >0.9999 | ns      | 0.2562  | *         | 0.016   |
| 35 nm $\alpha 5\beta 1$ + 5-FU vs.<br>70 nm $\alpha 5\beta 1$ + 5-FU             | ns        | 0.7976  | ns               | >0.9999 | ns      | 0.9578  | ns        | >0.9999 |
| 35 nm $\alpha 5\beta 1$ + 5-FU vs.<br>35 nm $\alpha v\beta 3$ + 5-FU             | *         | 0.0159  | ****             | <0.0001 | ns      | >0.9999 | ns        | >0.9999 |
| 35 nm $\alpha 5\beta 1$ + Paclitaxel vs.<br>50 nm $\alpha 5\beta 1$ + Paclitaxel | ns        | 0.9871  | ****             | <0.0001 | ns      | >0.9999 | ns        | 0.9992  |
| 35 nm $\alpha 5\beta 1$ + Paclitaxel vs.<br>70 nm $\alpha 5\beta 1$ + Paclitaxel | *         | 0.0334  | ns               | 0.4643  | ns      | 0.2703  | ns        | 0.961   |
| 35 nm $\alpha 5\beta 1$ + Paclitaxel vs.<br>35 nm $\alpha v\beta 3$ + Paclitaxel | *         | 0.0118  | ns               | 0.9422  | **      | 0.0049  | ****      | <0.0001 |
| 50 nm $\alpha 5\beta 1$ vs.<br>50 nm $\alpha 5\beta 1$ + 5-FU                    | ns        | >0.9999 | ns               | >0.9999 | ns      | >0.9999 | ns        | 0.6595  |
| 50 nm $\alpha 5\beta 1$ vs.<br>50 nm $\alpha 5\beta 1$ + Paclitaxel              | ns        | 0.5508  | **               | 0.0031  | ns      | 0.9998  | ns        | 0.8078  |
| 50 nm $\alpha 5\beta 1$ vs.<br>70 nm $\alpha 5\beta 1$                           | ns        | >0.9999 | ns               | 0.184   | ns      | 0.9917  | ns        | 0.4513  |
| 50 nm $\alpha 5\beta 1$ vs.<br>50 nm $\alpha v\beta 3$                           | ns        | >0.9999 | ****             | <0.0001 | ns      | >0.9999 | ns        | 0.9586  |
| 50 nm $\alpha 5\beta 1$ + 5-FU vs.<br>50 nm $\alpha 5\beta 1$ + Paclitaxel       | ns        | 0.9941  | ns               | 0.409   | ns      | 0.9973  | *         | 0.0297  |
| 50 nm $\alpha 5\beta 1$ + 5-FU vs.<br>70 nm $\alpha 5\beta 1$ + 5-FU             | ns        | >0.9999 | ns               | >0.9999 | ns      | >0.9999 | ns        | 0.3326  |
| 50 nm $\alpha 5\beta 1$ + 5-FU vs.<br>50 nm $\alpha v\beta 3$ + 5-FU             | ns        | 0.9929  | ***              | 0.0001  | ns      | 0.9278  | ns        | >0.9999 |
| 50 nm $\alpha 5\beta 1$ + Paclitaxel vs.<br>70 nm $\alpha 5\beta 1$ + Paclitaxel | ns        | 0.8007  | ****             | <0.0001 | ns      | 0.8505  | ns        | >0.9999 |
| 50 nm $\alpha 5\beta 1$ + Paclitaxel vs.<br>50 nm $\alpha v\beta 3$ + Paclitaxel | ns        | >0.9999 | ****             | <0.0001 | ns      | 0.9521  | ns        | 0.9931  |
| 70 nm $\alpha 5\beta 1$ vs.<br>70 nm $\alpha 5\beta 1$ + 5-FU                    | ns        | >0.9999 | ns               | >0.9999 | ns      | 0.9999  | ns        | >0.9999 |
| 70 nm $\alpha 5\beta 1$ vs.<br>70 nm $\alpha 5\beta 1$ + Paclitaxel              | ns        | >0.9999 | **               | 0.0025  | ns      | >0.9999 | ns        | >0.9999 |
| 70 nm $\alpha 5\beta 1$ vs.<br>70 nm $\alpha v\beta 3$                           | ***       | 0.0004  | ns               | >0.9999 | *       | 0.0208  | ns        | >0.9999 |
| 70 nm $\alpha 5\beta 1$ + 5-FU vs.<br>70 nm $\alpha v\beta 3$ + 5-FU             | ****      | <0.0001 | *                | 0.019   | ns      | 0.997   | ns        | >0.9999 |
| 70 nm $\alpha 5\beta 1$ + Paclitaxel vs.<br>70 nm $\alpha v\beta 3$ + Paclitaxel | ns        | 0.8176  | ***              | 0.0005  | ns      | 0.3262  | ns        | 0.1176  |
| 35 nm $\alpha v\beta 3$ vs.<br>35 nm $\alpha v\beta 3$ + 5-FU                    | **        | 0.0027  | *                | 0.0169  | ns      | 0.2051  | ns        | >0.9999 |
| 35 nm $\alpha v\beta 3$ vs.<br>35 nm $\alpha v\beta 3$ + Paclitaxel              | ****      | <0.0001 | **               | 0.0032  | ****    | <0.0001 | ***       | 0.0001  |
| 35 nm $\alpha v\beta 3$ vs.<br>50 nm $\alpha v\beta 3$                           | ns        | 0.3456  | ****             | <0.0001 | ns      | >0.9999 | ns        | 0.0743  |
| 35 nm $\alpha v\beta 3$ vs.<br>70 nm $\alpha v\beta 3$                           | ns        | 0.9986  | ns               | 0.7972  | ns      | 0.5599  | ns        | >0.9999 |
| 35 nm $\alpha v\beta 3$ + 5-FU vs.<br>35 nm $\alpha v\beta 3$ + Paclitaxel       | ****      | <0.0001 | ns               | >0.9999 | ns      | 0.9214  | ****      | <0.0001 |

|                                                                                  |      |         |      |         |      |         |      |         |
|----------------------------------------------------------------------------------|------|---------|------|---------|------|---------|------|---------|
| 35 nm $\alpha v\beta 3$ + 5-FU vs.<br>50 nm $\alpha v\beta 3$ + 5-FU             | ns   | >0.9999 | ns   | 0.9973  | ns   | >0.9999 | ns   | 0.7926  |
| 35 nm $\alpha v\beta 3$ + 5-FU vs.<br>70 nm $\alpha v\beta 3$ + 5-FU             | **** | <0.0001 | **** | <0.0001 | ns   | >0.9999 | ns   | >0.9999 |
| 35 nm $\alpha v\beta 3$ + Paclitaxel vs.<br>50 nm $\alpha v\beta 3$ + Paclitaxel | **** | <0.0001 | *    | 0.0271  | **** | <0.0001 | **** | <0.0001 |
| 35 nm $\alpha v\beta 3$ + Paclitaxel vs.<br>70 nm $\alpha v\beta 3$ + Paclitaxel | **** | <0.0001 | **** | <0.0001 | **** | <0.0001 | **** | <0.0001 |
| 50 nm $\alpha v\beta 3$ vs.<br>50 nm $\alpha v\beta 3$ + 5-FU                    | ns   | 0.5617  | ns   | 0.0583  | ns   | 0.9686  | ns   | >0.9999 |
| 50 nm $\alpha v\beta 3$ vs.<br>50 nm $\alpha v\beta 3$ + Paclitaxel              | ns   | 0.0641  | ns   | 0.5716  | ns   | >0.9999 | ns   | 0.9991  |
| 50 nm $\alpha v\beta 3$ vs.<br>70 nm $\alpha v\beta 3$                           | ***  | 0.0001  | **** | <0.0001 | ns   | 0.699   | ***  | 0.0003  |
| 50 nm $\alpha v\beta 3$ + 5-FU vs.<br>50 nm $\alpha v\beta 3$ + Paclitaxel       | ***  | 0.0002  | ***  | 0.0003  | ns   | 0.761   | ns   | 0.9871  |
| 50 nm $\alpha v\beta 3$ + 5-FU vs.<br>70 nm $\alpha v\beta 3$ + 5-FU             | **** | <0.0001 | **** | <0.0001 | ns   | >0.9999 | ns   | 0.7417  |
| 50 nm $\alpha v\beta 3$ + Paclitaxel vs.<br>70 nm $\alpha v\beta 3$ + Paclitaxel | ns   | >0.9999 | **** | <0.0001 | ns   | 0.3296  | ns   | 0.9998  |
| 70 nm $\alpha v\beta 3$ vs.<br>70 nm $\alpha v\beta 3$ + 5-FU                    | ns   | 0.1414  | *    | 0.0269  | ns   | >0.9999 | ns   | 0.999   |
| 70 nm $\alpha v\beta 3$ vs.<br>70 nm $\alpha v\beta 3$ + Paclitaxel              | ns   | 0.9992  | ns   | >0.9999 | **** | <0.0001 | **   | 0.006   |
| 70 nm $\alpha v\beta 3$ + 5-FU vs.<br>70 nm $\alpha v\beta 3$ + Paclitaxel       | *    | 0.0257  | ns   | 0.7521  | **** | <0.0001 | ns   | 0.9242  |

#### Supporting References:

- (1) Glass, R.; Möller, M.; Spatz, J. P. Block Copolymer Micelle Nanolithography. *Nanotechnology* **2003**, 14, 1153–1160.
- (2) Williges, C.; Chen, W.; Morhard, C.; Spatz, J. P.; Brunner, R. Increasing the Order Parameter of Quasi-Hexagonal Micellar Nanostructures by Ultrasound Annealing. *Langmuir* **2013**, 29, 989–993.
- (3) Schindelin, J.; Arganda-Carreras, I.; Frise, E.; Kaynig, V.; Longair, M.; Pietzsch, T.; Preibisch, S.; Rueden, C.; Saalfeld, S.; Schmid, B.; et al. Fiji: An Open-Source Platform for Biological-Image Analysis. *Nature Methods* **2012**, 9, 676–682.
- (4) Carpenter, A. E.; Jones, T. R.; Lamprecht, M. R.; Clarke, C.; Kang, I. H.; Friman, O.; Guertin, D. A.; Chang, J. H.; Lindquist, R. A.; Moffat, J.; et al. CellProfiler: Image Analysis Software for Identifying and Quantifying Cell Phenotypes. *Genome Biology* **2006**, 7, R100.
- (5) Rechenmacher, F.; Neubauer, S.; Polleux, J.; Mas-Moruno, C.; De Simone, M.; Cavalcanti-Adam, E. A.; Spatz, J. P.; Fässler, R.; Kessler, H. Functionalizing  $\alpha v\beta 3$ - or  $\alpha 5\beta 1$ -Selective Integrin Antagonists for Surface Coating: A Method to Discriminate Integrin Subtypes In Vitro. *Angewandte Chemie International Edition* **2013**, 52, 1572–1575.
